# Supplementary material for: ICAM-1-suPAR-CD11b Axis Is a Novel Therapeutic Target for Metastatic Triple-Negative Breast Cancer
Source: MDPI journal article supplement (doi:10.3390/cancers15102734), 2023-05-12
Supplement: s1 [file s1]

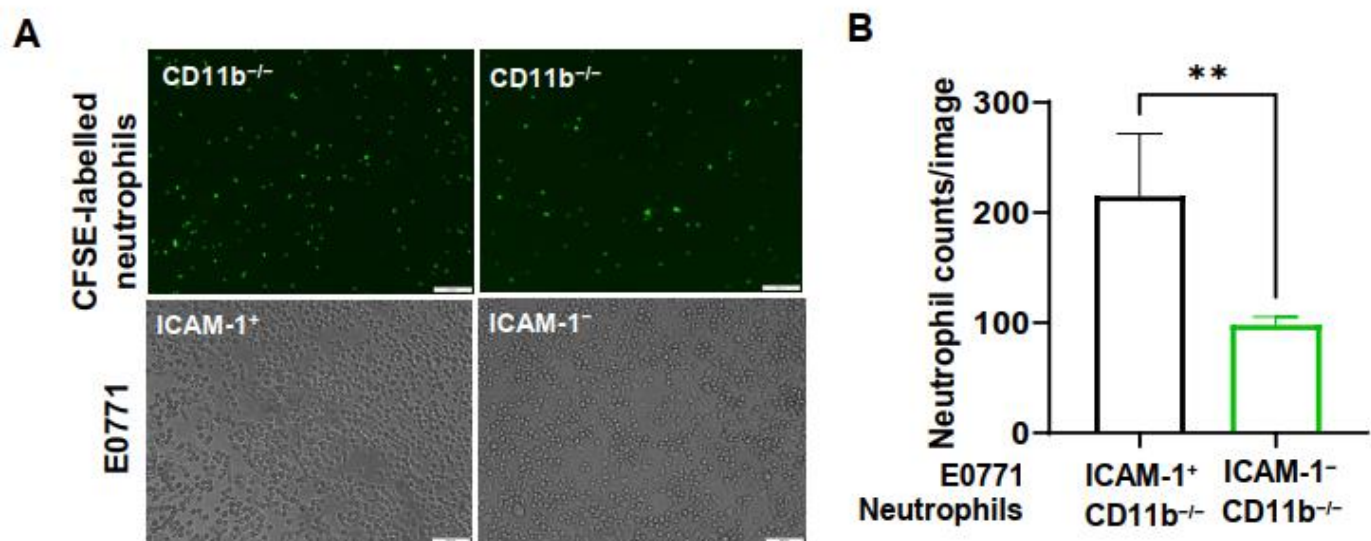

**Figure S1. ICAM-1 enhances the binding ability of tumor cells to neutrophils.** BM Neutrophils isolated from CD11b<sup>-/-</sup> mice were labeled with CFSE, and cocultured with ICAM-1<sup>+</sup> or ICAM-1<sup>-</sup> E0771 cells for 2h. The binding of neutrophils with tumor cells was imaged (**A**) and quantitated (**B**) (t-test, \*\*  $p < 0.01$ ,  $n = 5$ ).

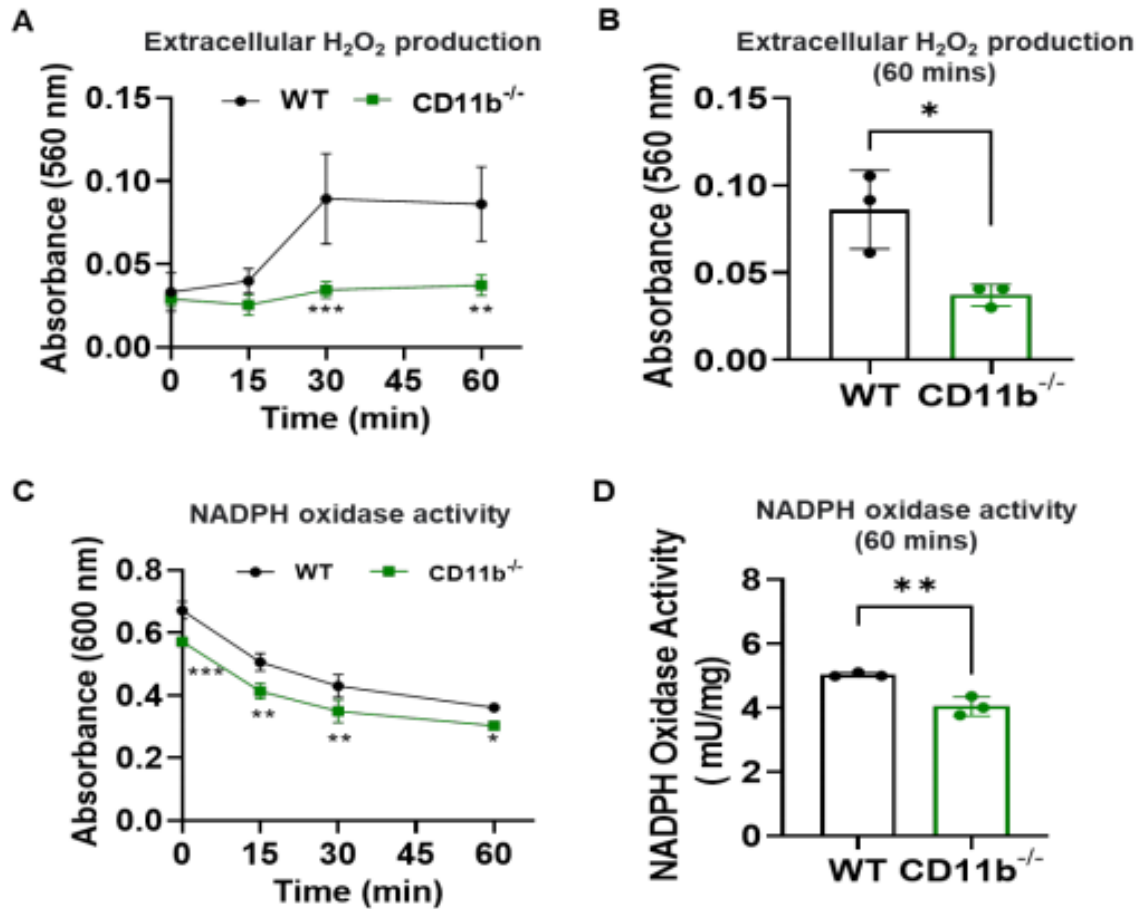

**Figure S2. CD11b promotes H<sub>2</sub>O<sub>2</sub> production from neutrophils via activation of NADPH oxidases.** (A, B) The bone marrow neutrophils were isolated from CD11b<sup>-/-</sup> and WT C57BL/6 mice. The extracellular H<sub>2</sub>O<sub>2</sub> production from neutrophils was measured by Amplex<sup>TM</sup> Red Hydrogen Peroxide/Peroxidase Assay Kit. The absorbance (OD<sub>560</sub> nm) was measured in kinetic mode for 60 minutes (mins) using the Promega<sup>TM</sup> GloMax<sup>®</sup> Plate Reader (A) and the extracellular H<sub>2</sub>O<sub>2</sub> production at 60 mins was quantitated (B). t-test, \**p* < 0.05, \*\**p* < 0.01, \*\*\**p* < 0.001 (n=3). (C, D) The bone marrow neutrophils were isolated from CD11b<sup>-/-</sup> and WT C57BL/6 mice, and the NADPH oxidase (NOX) activity was measured by NADPH Oxidase Activity Assay Kit. The absorbance (OD<sub>600</sub> nm) was measured in kinetic mode for 60 mins (C), and the NADPH oxidase activity (mU/mg) at 60 mins was calculated (D). t-test, \**p* < 0.05, \*\**p* < 0.01, \*\*\**p* < 0.001 (n=3).

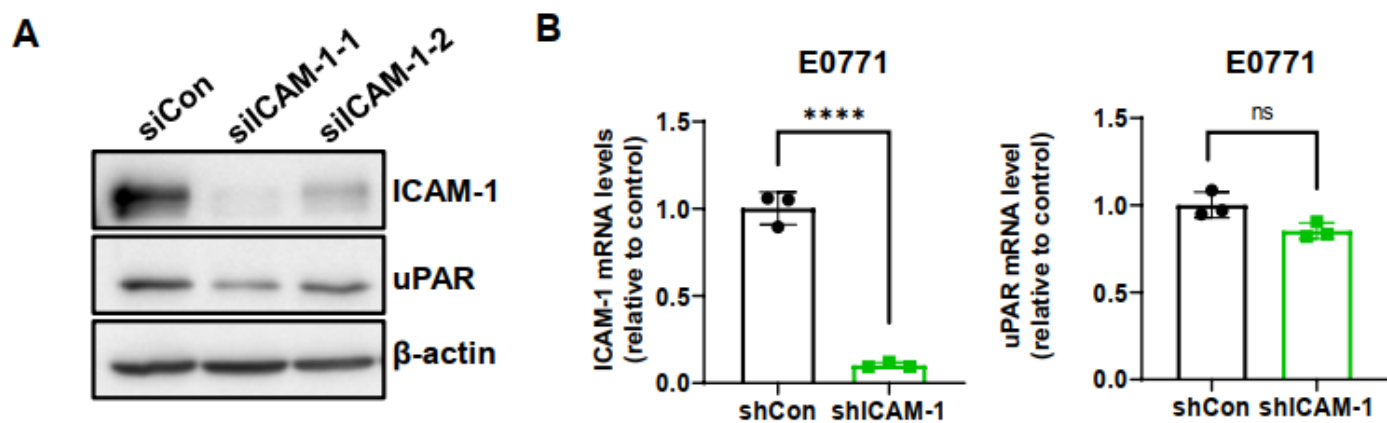

**Figure S3. ICAM-1 does not regulate uPAR mRNA levels.** (A) MDA-MB-231 cells were transfected with two different siICAM-1 RNAs. The cells were collected after 48 hours, and the expressions of ICAM-1 and uPAR were measured by Western blotting. (B) ICAM-1 does not regulate uPAR mRNA levels. The ICAM-1 and uPAR mRNA levels in control (shCon) and ICAM-1 knockdown (shICAM-1) E0771 cells were determined by RT-PCR. t-test, ns, not significant; \*\*\*\* $p < 0.0001$  ( $n=3$ ).

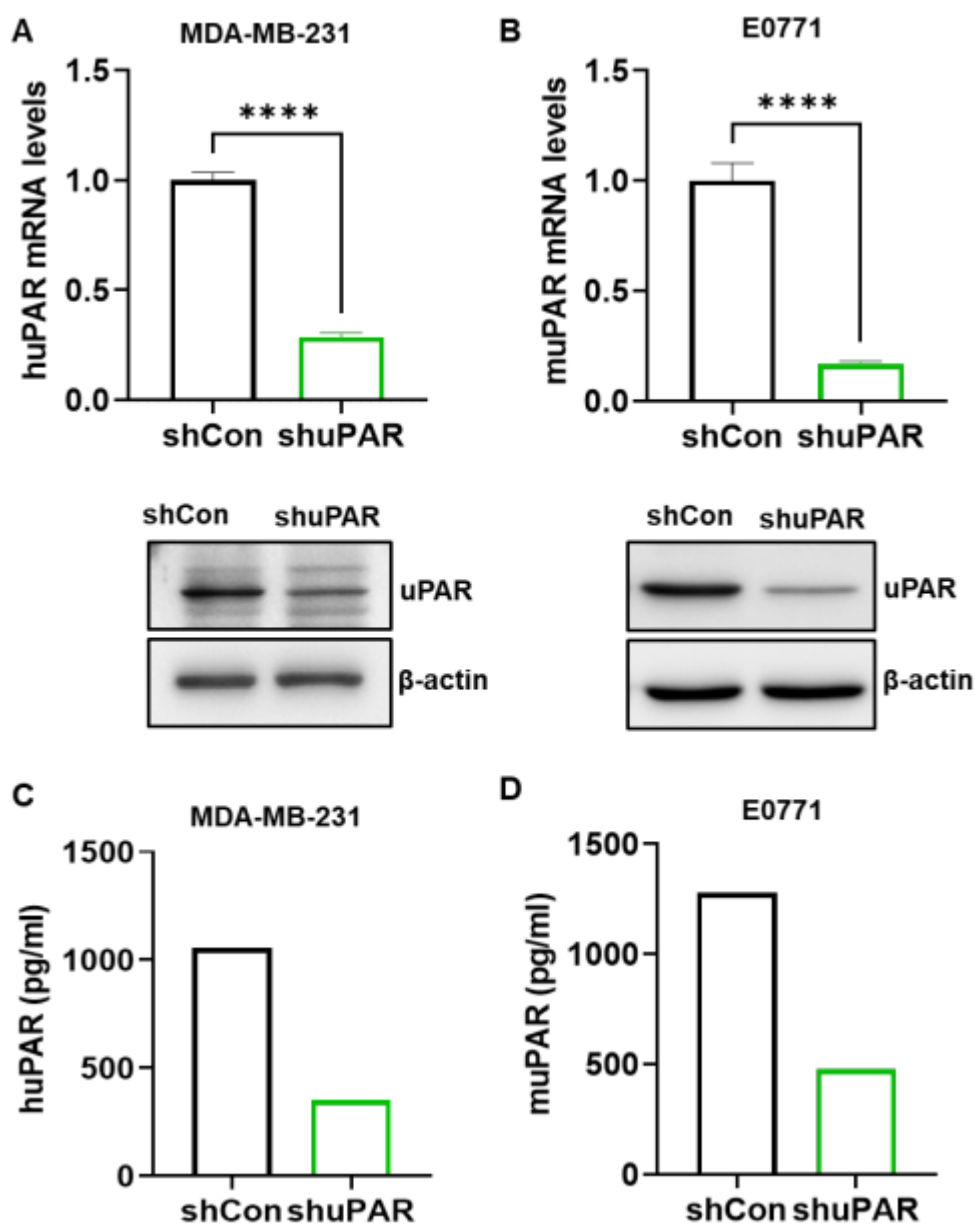

**Figure S4. uPAR knockdown efficacy in MDA-MB-231 and E0771 cells.** (A&B) The efficiency of uPAR knockdown in MDAMB-231 (A) and E0771 (B) cells. The uPAR mRNA (upper) and protein (lower) levels were determined by RT-PCR and Western blotting, respectively. t-test, \*\*\*\* $p < 0.0001$  ( $n=3$ ). (C&D) The secreted human uPAR and mouse uPAR in the supernatants from cultured control and uPAR knockdown MDA-MB-231 (left) and E0771 (right) cells were measured by uPAR ELISA kit. Representative data from two independent experiments were shown.

Table S1. PCR primers

| Primer   | Sequence (5' - 3')      |
|----------|-------------------------|
| hICAM-1F | ATGCCCAGACATCTGTGTCC    |
| hICAM-1R | GGGGTCTCTATGCCCAACAA    |
| huPAR F  | TGTAAGACCAACGGGGATTGC   |
| huPAR R  | AGCCAGTCCGATAGCTCAGG    |
| hGAPDH F | ACAACTTTGGTATCGTGGAAGG  |
| hGAPDH R | GCCATCACGCCACAGTTTC     |
| mICAM-1F | GTGATGCTCAGGTATCCATCCA  |
| mICAM-1R | CACAGTTCTCAAAGCACAGCG   |
| muPAR F  | CAGAGCTTTCCACCGAATGG    |
| muPAR R  | GTCCCCGGCAGTTGATGAG     |
| mGAPDH F | AGGTCGGTGTGAACGGATTTG   |
| mGAPDH R | TGTAGACCATGTAGTTGAGGTCA |

Table S2. PCR setting to synthesize cDNA for mRNA amplification

| Steps            | 1  | 2   | 3  | 4        |
|------------------|----|-----|----|----------|
| Temperature (°C) | 25 | 37  | 85 | 4        |
| Time (min)       | 10 | 120 | 5  | $\infty$ |

Table S3. qRT-PCR setting to amplify mRNA

|                  | Hold Stage |        | PCR Stage |        |        | Melt Curve |        |
|------------------|------------|--------|-----------|--------|--------|------------|--------|
| Steps            | 1          | 2      | 1         | 2      | 1      | 2          | 3      |
| Temperature (°C) | 50         | 95     | 95        | 60     | 95     | 60         | 95     |
| Time             | 2 min      | 10 min | 15 sec    | 30 sec | 15 sec | 1 min      | 15 sec |
| cycle            | × 1        |        | × 40      |        |        | × 1        |        |

Table S4. Antibodies

| <b>Ab name</b>                       | <b>Application</b> | <b>Dilution factor</b> | <b>Source</b> | <b>Cat. No.</b> |
|--------------------------------------|--------------------|------------------------|---------------|-----------------|
| <b>PE-anti-ICAM-1</b>                | IF                 | 1:100                  | BD            | 555511          |
| <b>APC-anti-CD45</b>                 | IF                 | N/A                    | CellSearch    | 7900001         |
| <b>PE-anti-cytokeratins</b>          | IF                 | N/A                    | CellSearch    | 7900001         |
| <b>ICAM-1</b>                        | WB                 | 1:1000                 | Proteintech   | 10020-1-AP      |
| <b>uPAR</b>                          | WB                 | 1:1000                 | Proteintech   | 10286-1-AP      |
| <b>actin</b>                         | WB                 | 1:2000                 | Thermo Fisher | MA5-11869       |
| <b>Ly6G</b>                          | IHC                | 1:500                  | BD            | 551459          |
| <b>APC anti-mouse/human CD11b</b>    | Flow               | 1:500                  | BioLegend     | 101212          |
| <b>APC/Cyanine7 anti-mouse Ly-6G</b> | Flow               | 1:500                  | BioLegend     | 127624          |
